# Supplementary material for: Xanthine Oxidase Inhibition by Febuxostat Attenuates Experimental Atherosclerosis in Mice
Source: PubMed Central journal article supplement (PMC3971401; doi:10.1038/srep04554), 2014-04-01

# **Xanthine Oxidase Inhibition by Febuxostat Attenuates Experimental**

## **Atherosclerosis in Mice**

Johji Nomura<sup>\*1,2</sup>, Nathalie Busso<sup>2</sup>, Annette Ives<sup>2</sup>, Chieko Matsui<sup>1</sup>, Syunsuke Tsujimoto<sup>1</sup>,

Takashi Shirakura<sup>1</sup>, Mizuho Tamura<sup>1</sup>, Tsunefumi Kobayashi<sup>1</sup>, Alexander So<sup>2</sup>, Yoshihiro

Yamanaka<sup>1</sup>

<sup>1</sup>Pharmaceutical Department Research Laboratories, Teijin Institute for Bio-Medical

Research, Teijin Pharma Limited, Hino, Tokyo, Japan, <sup>2</sup>Service of Rheumatology,

Department of l'Appareil Locomoteur, Centre Hospitalier Universitaire Vaudois,

University of Lausanne, Lausanne, Switzerland

## Supplementary Figure S1

### Febuxostat Inhibits Endothelial Dysfunction in ApoE<sup>-/-</sup> Mice

Increased levels of ROS can react with nitric oxide to generate metabolites that result in endothelial dysfunction<sup>1</sup>. We therefore examined whether the inhibition of ROS generation by febuxostat had an effect on endothelial dysfunction in ApoE<sup>-/-</sup> mice. ACh-responsiveness of aorta from ApoE<sup>-/-</sup> mice was significantly reduced compared to that from WT mice, indicating endothelial dysfunction in aorta of ApoE<sup>-/-</sup> mice. Treatment with febuxostat for 12 weeks significantly improved ACh-responsiveness in ApoE<sup>-/-</sup> mice. On the other hand, SNP-induced relaxation and PE-induced contraction were not affected by febuxostat treatment. Altogether, these data suggest that the increased XOR and subsequent oxidative stress in endothelial cells, cause endothelial dysfunction.

**Supplementary Figure S1.** Febuxostat inhibits endothelial dysfunction in ApoE<sup>-/-</sup> mice.

**a,** Endothelial cell-dependent relaxation to ACh in PE-precontracted aortic rings from vehicle-treated WT (n=8), vehicle-treated ApoE<sup>-/-</sup> (n=9), and febuxostat-treated ApoE<sup>-/-</sup> mice (n=8). Data are pooled from two independent experiments in which similar results were obtained, and shown as mean±SEM. #*P*<0.05, ##*P*<0.01 versus vehicle-treated WT,

\* $P < 0.05$ , \*\* $P < 0.01$  versus vehicle-treated ApoE<sup>-/-</sup> mice. **b**, Endothelial cell-independent relaxation to SNP in PE-precontracted aortic rings from vehicle-treated WT (n=8), vehicle-treated ApoE<sup>-/-</sup> (n=9), and febuxostat-treated ApoE<sup>-/-</sup> mice (n=8). Data are pooled from two independent experiments in which similar results were obtained, and shown as mean±SEM. **c**, Contraction to PE in aortic rings from vehicle-treated WT (n=8), vehicle-treated ApoE<sup>-/-</sup> (n=9), and febuxostat-treated ApoE<sup>-/-</sup> mice (n=8). Data are pooled from two independent experiments in which similar results were obtained, and shown as mean±SEM.

1. Mudau, M., Genis, A., Lochner, A. & Strijdom, H. Endothelial dysfunction: the early predictor of atherosclerosis. *Cardiovasc J Afr* **23**, 222-31 (2012).

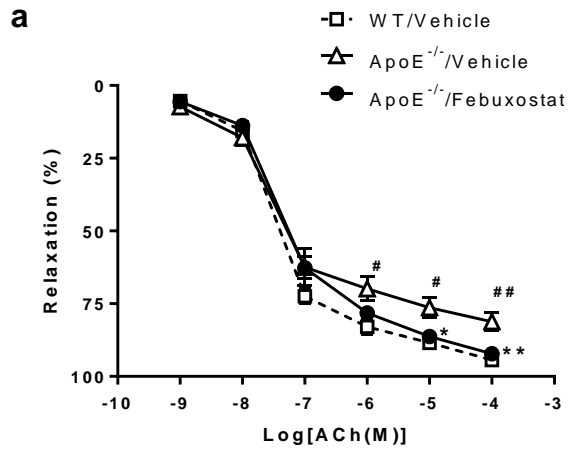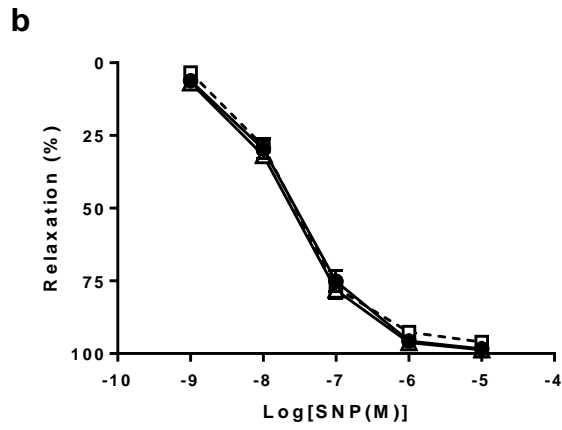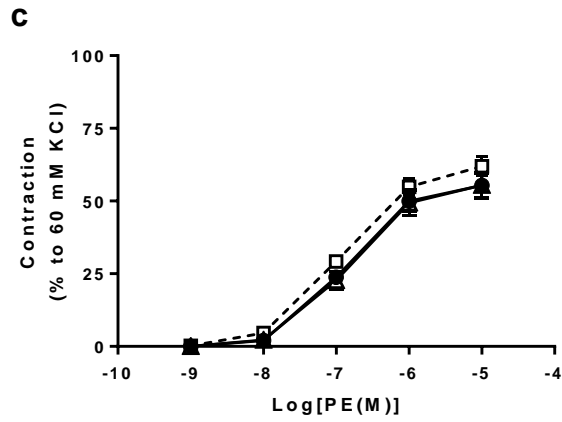

Supplement: srep04554-s1.pdf [file srep04554-s1.pdf]
